1 Electrophysiological evidence of synergistic auxin transport by interacting  
2 Arabidopsis ABCB4 and PIN2 proteins\*

3  
4 Stephen D. Deslauriers<sup>1</sup> and Edgar P. Spalding\*

5  
6 Department of Botany  
7 University of Wisconsin-Madison  
8 Madison WI 53706  
9 USA

10  
11 short title: electrophysiology of ABCB4 and PIN2 proteins

12  
13  
14 <sup>1</sup>Present address:

15 Division of Science and Math  
16 University of Minnesota, Morris  
17 600 East Fourth Street  
18 Morris, MN 56267

19  
20 \*corresponding author [spalding@wisc.edu](mailto:spalding@wisc.edu) tel: 608-265-5294

21  
22 \*The author responsible for distribution of materials integral to the findings  
23 presented in this article is Edgar P. Spalding ([spalding@wisc.edu](mailto:spalding@wisc.edu)).

24

25

26 **Abstract**

27 To understand why both ATP-binding cassette B (ABCB) and PIN-FORMED (PIN)  
28 proteins are required for polar auxin transport through tissues, even though only  
29 the latter is polarly localized, we biophysically studied their transport  
30 characteristics separately and together by whole-cell patch clamping. ABCB4 and  
31 PIN2 from *Arabidopsis thaliana* expressed in human embryonic kidney cells  
32 displayed electrogenic activity when CsCl-based electrolytes were used. Current-  
33 voltage (I-V) analysis of the activities and modeling the effects of adding the auxin  
34 anion (IAA<sup>-</sup>) as a potential substrate with the Goldman-Hodgkin-Katz equation,  
35 demonstrated that ABCB4 and PIN2 were 9-fold and 10-fold more selective for  
36 IAA<sup>-</sup> than Cl<sup>-</sup>, respectively. Thus, these proteins directly transport IAA<sup>-</sup>, which was  
37 not unequivocally established by previous auxin retention assays. Co-expression of  
38 ABCB4 and PIN2 produced an especially significant result. Co-expression  
39 synergistically doubled the selectivity for IAA<sup>-</sup>. An area of two-fold higher selectivity  
40 for IAA<sup>-</sup> that this result indicates will occur in cells with asymmetric PIN2 and  
41 symmetric ABCB4 matches what early models found to be necessary to create  
42 observed levels of polar auxin transport through tissues. Thus, the requirement for  
43 two different proteins appears to be explained by a synergistic effect on selectivity.  
44 More substrate details and important pharmacological results are reported.

45

## 46 **Introduction**

47 A special mechanism for directing auxin to its sites of action was recognized even  
48 before the chemical identity of this important plant hormone was known (Went and  
49 Thimann, 1937). So-called polar auxin transport was originally proposed to result  
50 from channels at the downstream faces of each cell releasing auxin anions down a  
51 large thermodynamic gradient (Rubery and Shelldrake, 1974; Raven, 1975;  
52 Goldsmith, 1977). Discovery of PIN-FORMED (PIN) proteins that are required for  
53 polar auxin transport and asymmetrically localized at the plasma membrane in  
54 accordance with the theory was a genuine breakthrough (Okada et al., 1991; Chen et  
55 al., 1998; Gälweiler et al., 1998; Křeček et al., 2009; Petrášek et al., 2006). However,  
56 it became apparent that a PIN-only explanation was insufficient when members of  
57 the B subfamily of ATP-Binding Cassette (ABCB) transporters were also shown to be  
58 essential for polar auxin transport yet not asymmetrically localized in the cells  
59 performing the transport (Sidler et al., 1998; Noh et al., 2001; Terasaka et al., 2005;  
60 Cho et al., 2007; Wu et al., 2007; Wu et al., 2010). Why asymmetrically-localized PIN  
61 proteins and symmetrically-localized ABCB proteins are both essential for polar  
62 auxin transport is an open question (Spalding, 2013).

63 The most widespread view of PIN and ABCB function, based largely on  
64 radioactively-labelled auxin retention assays, is that both types of proteins are auxin  
65 transporters (Geisler et al., 2005; Petrášek et al., 2006; Yang and Murphy, 2009;  
66 Kubeš et al., 2012; Kamimoto et al., 2012). Tests of the prevailing view with  
67 independent methodologies would be valuable because alternative explanations of  
68 the existing data are plausible (Spalding, 2013). The principal method for studying  
69 electrogenic transporters, those that produce an electric current when transporting  
70 their substrate, is to express the transporter in a non-plant cell and then use patch-  
71 clamp electrophysiology to analyze any ionic currents attributable to the expressed  
72 transporter (Dryer et al., 1998). This approach demonstrated that the ABCB19  
73 protein from *Arabidopsis* produced ion channel activity with weak selectivity for  
74 anions over cations when the human embryonic kidney (HEK) cell was the  
75 heterologous expression system (Cho et al., 2014). The anion channel blocker that  
76 Noh et al. (2001) used in the screen for upregulated genes that originally identified

77 *ABCB19*, a chemical called 5-nitro-2-(3-phenylpropylamine)-benzoic acid (NPPB),  
78 blocked the *ABCB19* channel activity in HEK cells. The same low concentration of  
79 NPPB also blocked polar auxin transport very effectively in *Arabidopsis* roots, and  
80 blocked gravitropism, indicating that the anion channel activity in the heterologous  
81 system was functionally relevant.

82 The *Arabidopsis ABCB19* gene was originally called *MDR1* (Noh et al., 2001)  
83 because when it was isolated, the only similar sequence in the database was human  
84 *MDR1*, also called *P-gp1*, and now known as *ABCB1*. Human *ABCB1* is best known  
85 for its role in removing chemotherapeutic molecules from tumor cells (Ambudkar et  
86 al., 2003). It has also been reported to possess inorganic ion transport activity, or to  
87 modulate a separate ion transport activity (Valverde et al., 1992; Higgins, 1995;  
88 Hoffman et al., 1996; Roepe, 2000; Fletcher et al., 2010). The more distantly related  
89 *ABCC7* protein, called the cystic fibrosis transmembrane regulator (CFTR), is a Cl<sup>-</sup>  
90 channel with a pore that is blocked by NPPB (Wang et al., 2005; Csanády and  
91 Töröcsik, 2014). In the case of plant *ABCB* transporters, the auxin anion (IAA<sup>-</sup>) may  
92 be a natural substrate, transported across the membrane in a channel-like fashion.  
93 The blocking effects of NPPB on the channel and polar auxin transport (Cho et al.,  
94 2014), and the impaired polar auxin transport in *abcb* mutants (Noh et al., 2001;  
95 Lewis et al., 2007) support this idea. Still lacking is a demonstration of an *ABCB*  
96 protein transporting IAA<sup>-</sup> channel-like, i.e. passively in the thermodynamic sense. In  
97 the case of PIN proteins, their role as auxin transporters is inferred from the amount  
98 of auxin retained in cells engineered to express or lack them (Geisler et al., 2005;  
99 Petrášek et al., 2006; Yang and Murphy, 2009; Weller et al., 2017; ). No  
100 electrophysiological investigations of PIN transport activity have been reported.  
101 Presumably, they transport IAA<sup>-</sup> passively, i.e. thermodynamically downhill and  
102 therefore should show electrogenic activity. Some of the experiments reported here  
103 directly test if *ABCB* and PIN proteins electrogenically transport IAA<sup>-</sup> in the manner  
104 of thermodynamically passive efflux channels.

105 To understand why both *ABCB* and PIN are both necessary for the polar  
106 auxin transport phenomenon in tissues, their interactions must be understood in  
107 addition to their separate transport activities. Co-immunoprecipitation and yeast

108 two-hybrid assays indicate PIN and ABCB proteins physically interact. Evidence of  
109 functional interaction comes from measurements of radioactive auxin retained in  
110 cells expressing both protein types (Yang and Murphy, 2009; Blakeslee et al., 2007;  
111 Mravec et al., 2008; Titapiwatanakun et al., 2008; Cho et al., 2012). It has been  
112 suggested (Spalding, 2013) that interactions between the two proteins may produce  
113 a synergistic function, potentially explaining why polar auxin transport is disrupted  
114 in a mutant that cannot place ABCB transporters in the plasma membrane but  
115 properly places PIN transporters (Wu et al., 2010; Wang et al., 2013).

116 The experiments reported here used ABCB4 and PIN2 because these  
117 members of the two protein families required for auxin transport are expressed in  
118 the same outer cell layers of the Arabidopsis root, both are required for shootward  
119 polar auxin transport, and both participate in the root gravitropism response (Abas  
120 et al., 2006; Lewis et al., 2007). They are a logical pair of proteins to study  
121 separately and together with new methods in order to advance our understanding  
122 of the polar auxin transport mechanism.

123

## 124 **Results**

### 125 *ABCB4 and PIN2 display weakly anion-selective channel activity*

126 To test the hypothesis that ABCB4 and PIN2 transport activities are electrogenic and  
127 therefore may be studied biophysically with the patch clamp technique, cDNA  
128 encoding one or the other of these proteins was expressed in cultured HEK cells.  
129 The bi-cistronic transfection vector also encoded a fluorescent protein marker in  
130 order to determine which cells in a field were suitable for patch clamp analysis. The  
131 major component of the pipette and bath solutions was 140 mM CsCl, chosen to  
132 preclude currents from endogenous sodium and potassium channels. In response to  
133 a voltage-step protocol, cells expressing ABCB4 or PIN2 displayed time-independent  
134 inward and outward currents that were three or four-fold greater than currents  
135 recorded from controls cells transfected with a vector containing only the  
136 fluorescent marker (Figure 1A). Current-voltage (I-V) relationships in these  
137 symmetric CsCl conditions were approximately linear and reversed (I=0) at -5 or -8  
138 mV (Figure 1B). A rigorous method to measure relative ion selectivity is to change  
139 the concentration difference between the pipette and bath solutions and then  
140 measure the shift in reversal potential of the I-V curve (Hille, 2001). Reducing the  
141 CsCl concentration in the bath solution from 140 mM to 14 mM to create an  
142 asymmetric condition shifted the reversal voltage ( $E_{rev}$ ) of control cells by -11 mV.  
143 The Goldman-Hodgkin-Katz (GHK) equation (Equation 1) relates  $E_{rev}$  to the  
144 membrane's permeability to the principal ions present as explained by Hille (2001).  
145

$$\Delta E_{rev} = \frac{RT}{F} \ln \frac{P_{Cs}[Cs^+]_o + P_{Cl}[Cl^-]_i}{P_{Cs}[Cs^+]_i + P_{Cl}[Cl^-]_o} \quad \text{Eqn 1}$$

146

147 A  $\Delta E_{rev}$  of -11 mV indicates the average control plasma membrane was 0.59 times as  
148 permeable to  $Cl^-$  as it was to  $Cs^+$  ( $P_{Cl}:P_{Cs} = 0.59$ ). The same shift of the bath solution  
149 from 140 mM to 14 mM CsCl shifted  $E_{rev}$  of ABCB4-expressing cells significantly in  
150 the opposite direction, to 11 mV (Figure 2A), corresponding to a  $P_{Cl}:P_{Cs} = 1.7$ . The  
151 plasma membrane of PIN2-expressing cells displayed a  $\Delta E_{rev}$  of 23 mV,  
152 corresponding to a  $P_{Cl}:P_{Cs} = 3.1$  (Figure 2B). Thus, expressing ABCB4 or PIN2 shifted

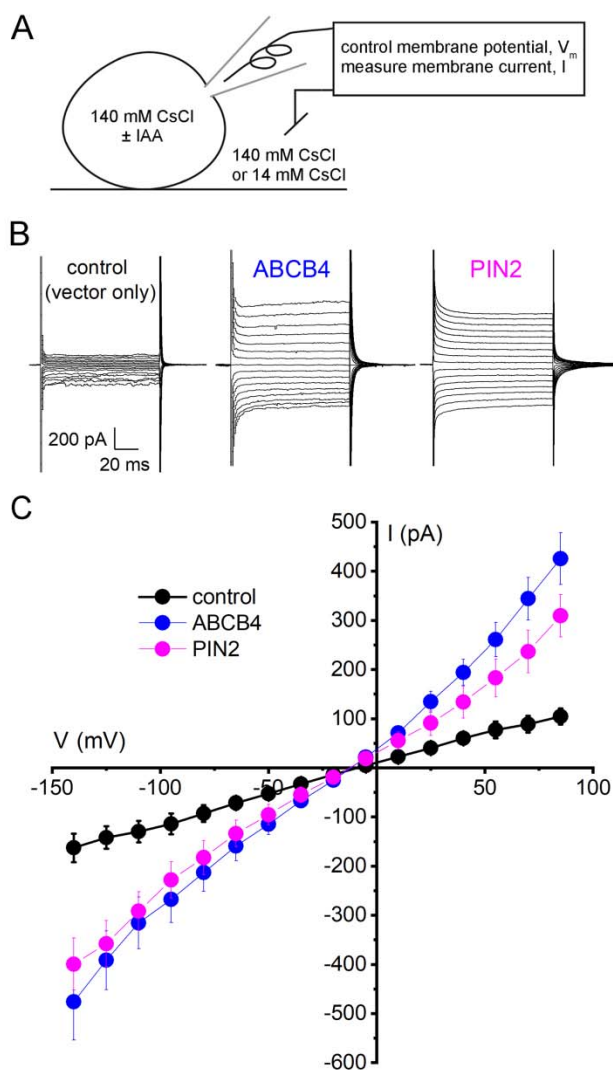

**Figure 1.** Electrogenic activities of ABCB4 and PIN2 proteins expressed in HEK cells. **A**, Diagram of the whole-cell patch clamp technique employing  $\text{Cs}^+$  and  $\text{Cl}^-$  as principal charge carriers. The amplifier controlled (clamped) the membrane potential ( $V$ ) while the transmembrane electric currents ( $I$ ) were measured. The cells were transfected with a vector carrying only EGFP or DsRED cDNA (control), ABCB4 and EGFP cDNA in separate reading frames, or PIN2 and DsRED cDNA in separate reading frames. **B**, Example recordings of transmembrane currents elicited by step-wise changes in  $V$  recorded from control cells and cells transfected with ABCB4 or PIN2. **C**,  $I$  versus  $V$  curves represent mean current  $\pm$  SE at each membrane potential measured in control cells ( $n = 5$ ), ABCB4-expressing cells ( $n = 6$ ), and PIN2-expressing cells ( $n = 6$ ). The pipette and bath solutions contained 140 mM CsCl.

153 the HEK cell membrane from less to more permeable to  $\text{Cl}^-$  relative to  $\text{Cs}^+$ , consistent  
 154 with a role in auxin transport because essentially all indole-3-acetic acid is in the

155 anionic form (IAA<sup>-</sup>) at the pH of cytoplasm (Raven, 1975; Spalding, 2013). When  
156 ABCB4 and PIN2 were co-expressed, the  $P_{Cl}:P_{Cs}$  of the membrane was 2.5 (Figure



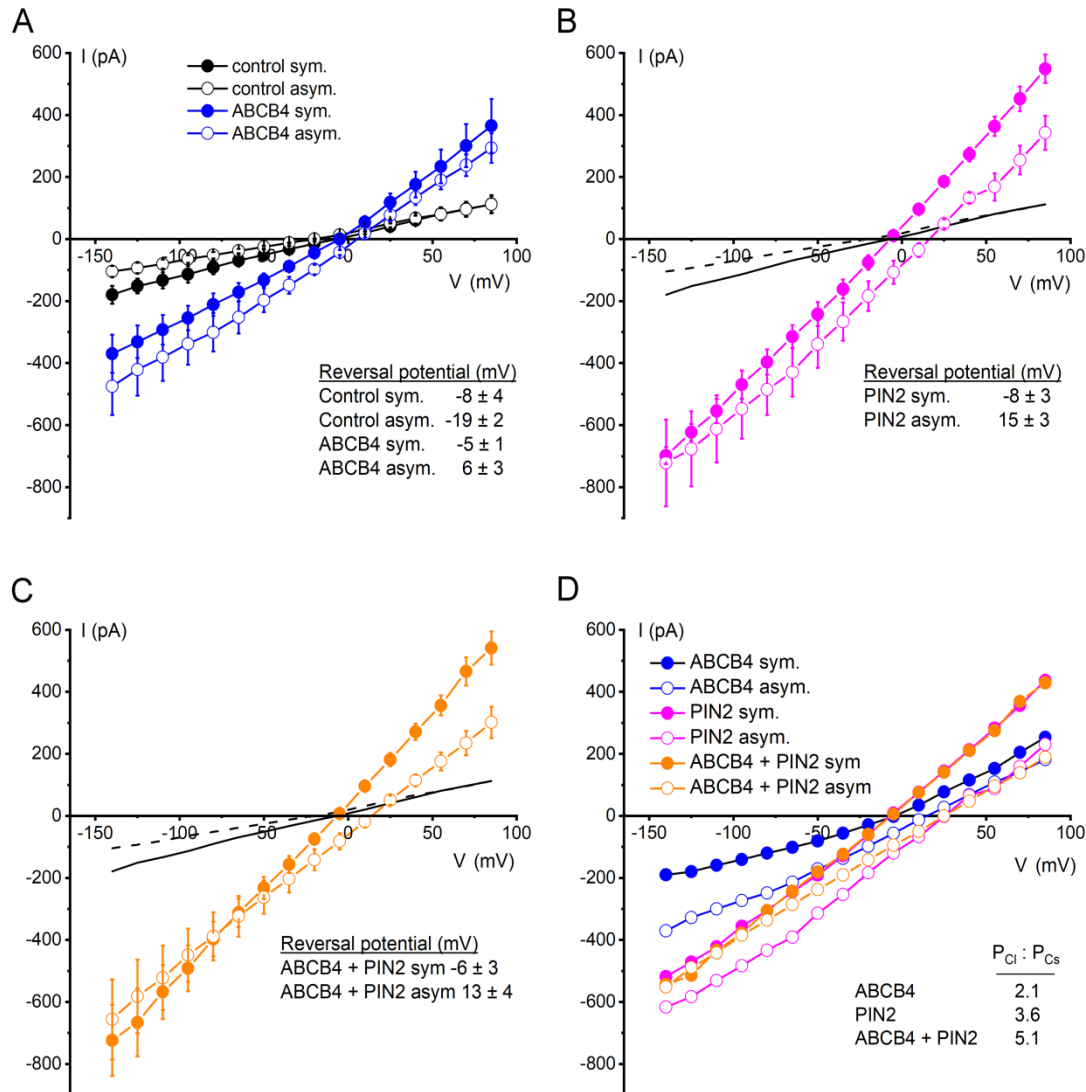

**Figure 2.** Anion preferences ABCB4, PIN2, and co-expressed ABCB4 and PIN2 transport activities demonstrated by current-voltage analysis. **A**, ABCB4 and control cell I-V relationships recorded with 140 mM CsCl in the bath and pipette (symmetrical) and after switching the bath to 14 mM CsCl (asymmetrical). The average membrane potentials at which  $I=0$  (reversal potential) for each condition are shown. Plotted are the mean currents  $\pm$  SE at each voltage obtained from 4 separate cells for each condition. Positive changes in reversal potential indicate preference for  $Cl^-$  over  $Cs^+$ . **B**, same as A but for cells expressing PIN2. The control cell curves are re-plotted from A. **C**, same as B but for cells co-expressing ABCB4 and PIN2. **D**, ABCB4-, PIN2-, and ABCB4+PIN2-dependent I-V curves were generated from the data in A-C by subtracting average control currents from each. The  $Cl^-$  to  $Cs^+$  permeability ratios ( $P_{Cl^-} : P_{Cs^+}$ ) derived from the reversal potentials of these curves are included in the plot.

157 2C). To separate the the activities of the plant proteins from background  
 158 permeabilities, the average endogenous HEK cell (control) I-V curve was subtracted

159 from the average experimental I-V curves, the  $E_{rev}$  for each difference curve was  
160 determined, and the  $P_{Cl}:P_{Cs}$  for the expressed transporter was calculated. Figure 2D  
161 shows the difference I-V curves and the calculated  $P_{Cl}:P_{Cs}$  for ABCB4 (2.1), PIN2  
162 (3.6), and ABCB4+PIN2 (5.1).

### 163 *ABCB4 and PIN2 conduct IAA<sup>-</sup>*

164 To test whether ABCB4 or PIN2 can also conduct IAA<sup>-</sup>, auxin in the pipette solution  
165 was increased from 0.1  $\mu$ M to 1 mM IAA in a solution containing only 50 mM CsCl to  
166 reduce background or competing currents (Figure 3A,B). If ABCB4 or PIN2 proteins  
167 conduct IAA<sup>-</sup>, increasing its concentration in the pipet should shift  $E_{rev}$  to a more  
168 positive voltage. Figure 3C,D shows that significant positive shifts were observed in  
169 cells expressing ABCB4, PIN2, and ABCB4+PIN2, but not in control cells. These  
170 biophysical measurements establish that ABCB4 and PIN2 transport IAA<sup>-</sup> across the  
171 membrane. Furthermore, the physiological relevance of the different magnitudes of  
172 the IAA-dependent shifts in  $E_{rev}$  become apparent when the results are analyzed  
173 with a GHK-based model of the experiment (Eqn 2).

174

$$175 \quad \Delta E_{rev} = \frac{RT}{F} \ln \frac{P_{Cs}[Cs^+]_o + P_{Cl}[Cl^-]_i + P_{IAA}[IAA^-]_i}{P_{Cs}[Cs^+]_i + P_{Cl}[Cl^-]_o + P_{IAA}[IAA^-]_o} \quad \text{Eqn 2}$$

176

177 The IAA-dependent shifts in  $E_{rev}$  can be used to determine  $P_{IAA}$  relative to  $P_{Cl}$   
178 for each of the transporters and their combination (Figure 4). The values used to  
179 parameterize the GHK model (Eqn 2) were derived from the data in Fig. 2D.  $P_{Cl}:P_{Cs}$   
180 was 2.1 for ABCB4, 3.6 for PIN2, and 5.1 for ABCB4+PIN2. The resulting curves  
181 show that the measured auxin-dependent  $E_{rev}$  shifts (Figure 3D), i.e. 2.9 mV for  
182 ABCB4, 3.8 mV for PIN2, and 6.6 mV for ABCB4+PIN2, reflect a  $P_{IAA}:P_{Cl}$  of 9 for  
183 ABCB4, 10 for PIN2, and 18 for ABCB4+PIN2. Thus, a membrane containing ABCB4  
184 and PIN2 are manifold more selective for IAA<sup>-</sup> than for Cl<sup>-</sup>, and the activity formed  
185 by the combination of these proteins is approximately 2-fold more selective for IAA<sup>-</sup>  
186 over Cl<sup>-</sup> than either protein alone. The results in Figures 3 and 4 constitute  
187 biophysical evidence of ABCB4 and PIN2 proteins directly transporting IAA<sup>-</sup>, and  
188 that selectivity of the permeation pathway(s) for IAA<sup>-</sup> approximately doubled when

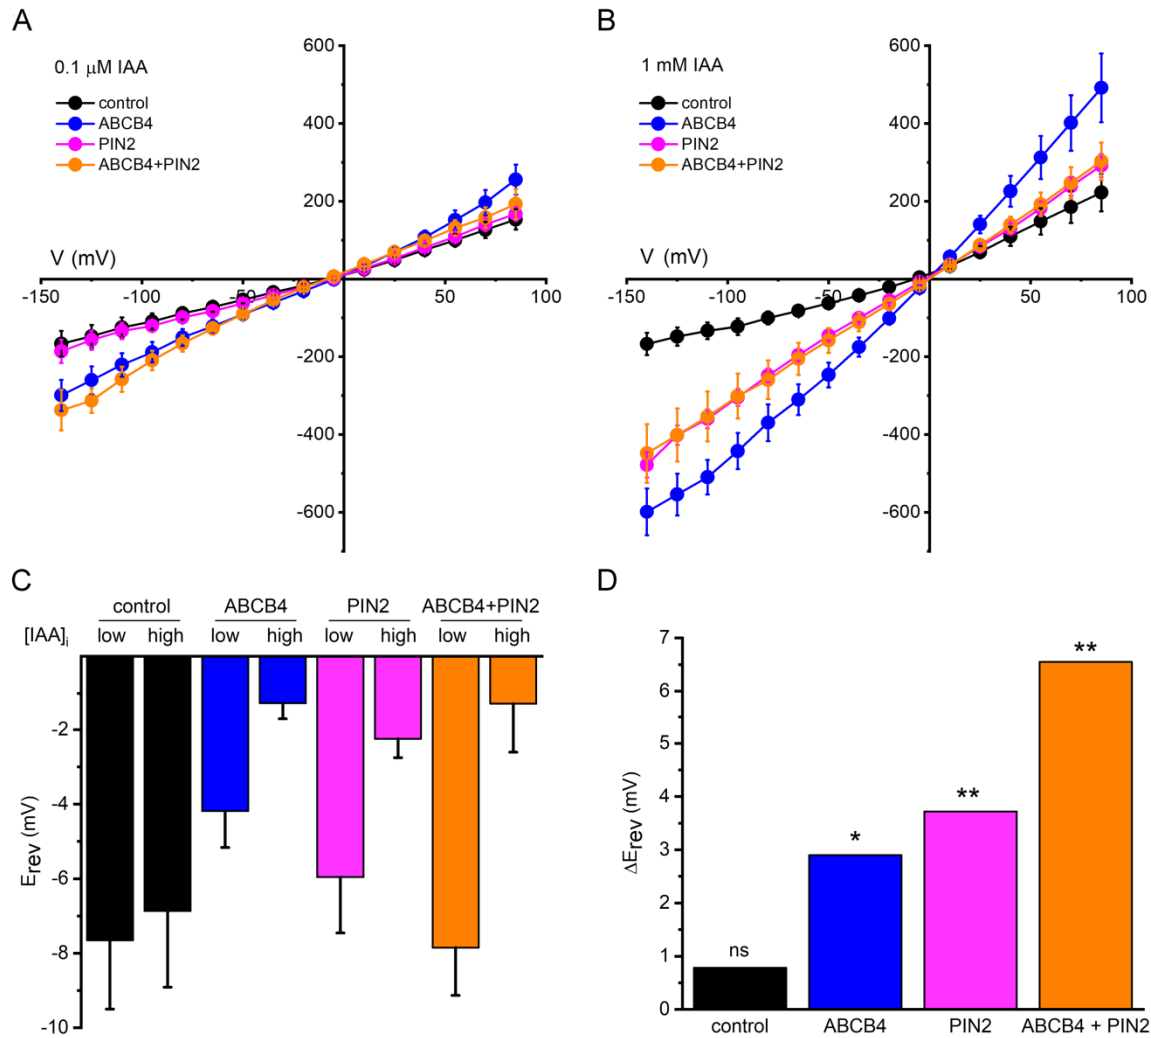

**Figure 3.** IAA<sup>-</sup> permeability demonstrated by current-voltage analysis. A, I-V curves obtained in symmetrical 50 mM CsCl conditions with 0.1  $\mu\text{M}$  IAA in the pipette, i.e. on the cytoplasmic side. B, I-V curves obtained as in A but with 1 mM IAA in the pipette. The number of independent cells measured per condition was between 4 and 14. C, Reversal potentials ( $E_{rev}$ ) of I-V curves obtained with either 0.1  $\mu\text{M}$  IAA (low) or 1 mM IAA (high) in the pipette. D, Differences in  $E_{rev}$  ( $\Delta E_{rev}$ ) due to a change in the IAA gradient. T-tests were performed. ns = no statistical significance, \* =  $p < 0.05$ , \*\* =  $p < 0.01$ .

189 both proteins were present in the same membrane. The results show that co-  
 190 expression did not increase the activity. In fact, the amount of ionic current flowing  
 191 at each of the imposed membrane potentials was reduced compared to ABCB4  
 192 expressed alone (Figure 3B). Rather, the contribution of IAA<sup>-</sup> to the transported  
 193 current is what roughly doubled when the two proteins were co-expressed.

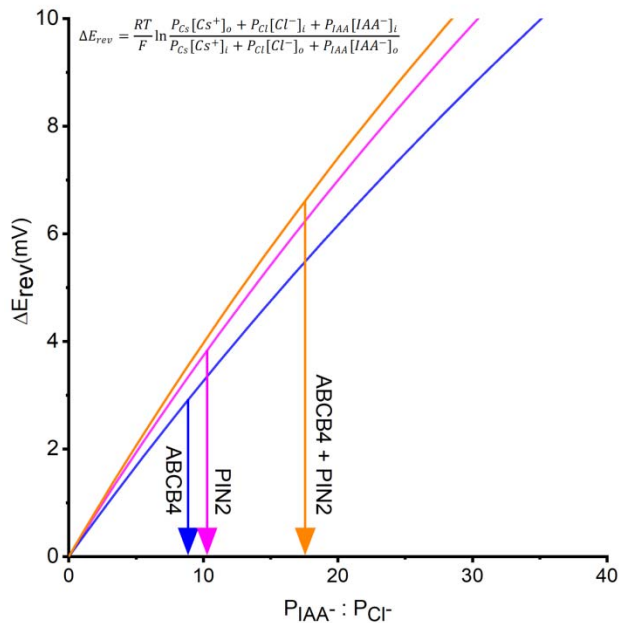

**Figure 4.** ABCB4 and PIN2 are highly selective for IAA<sup>-</sup> over Cl<sup>-</sup>, and the selectivity approximately doubles when the two are co-expressed. The Goldman-Hodgkin-Katz model of membrane transport was parameterized with values of (P<sub>Cl</sub>) relative to Cs<sup>+</sup> permeability (P<sub>Cs</sub>) calculated from the results in Figure 2D to determine the permeability of IAA<sup>-</sup> relative to Cl<sup>-</sup> (P<sub>IAA</sub> : P<sub>Cl</sub>) based on the ΔE<sub>rev</sub> values presented in Figure 3D.

194 While testing whether IAA<sup>-</sup> transport could be detected with  
 195 electrophysiology methods, a stimulatory effect of the hormone on transporter  
 196 activity was observed, particularly for ABCB4 (compare Figure 3A and Figure 3B).  
 197 Additional experiments were performed to investigate the potential for auxin  
 198 regulation of the auxin transport activity. Figure 5A shows that increasing IAA  
 199 concentration in the pipette from 0.1 μM to 1 μM increased the current in ABCB4-  
 200 expressing cells. Increasing it further to 1 mM further increased the activity (data  
 201 from Figure 3B). PIN2 activity was also stimulated by auxin but not within the  
 202 presumed physiologically relevant range of 0.1-1 μM (Figure 5B). Benzoic acid (BA)  
 203 is a weak acid often used as a non-transported control compound in polar auxin  
 204 transport assays. It did not stimulate ABCB4 or PIN2 channel activity (Figure 6A,B).  
 205 Auxin (indole-3-acetic acid) is structurally related to the amino acid tryptophan  
 206 (Trp), which did not stimulate activity like auxin (Fig. 6A,B). These results  
 207 demonstrate that IAA but not any weak acid or related indole compound activates  
 208 ABCB4 and PIN2 transport.

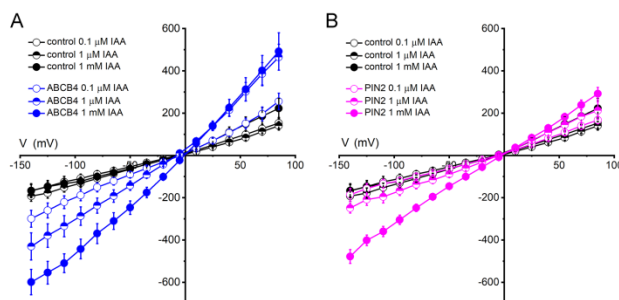

**Figure 5.** Effects of auxin on transport activity of ABCB4 and PIN2. **A**, I-V relationships for ABCB4 obtained with different concentrations of IAA<sup>-</sup> in the pipette. **B**, I-V curves for PIN2 obtained with different concentrations of IAA<sup>-</sup> in the pipette. The pipette and bath solutions contained 50 mM CsCl. The same control data are plotted in A and B, the 0.1  $\mu$ M IAA and 1 mM IAA data are replotted from Figure 3. The 1  $\mu$ M IAA data are mean currents  $\pm$  SE obtained from n= 6 control cells, n=4 ABCB4 cells, and n=5 PIN2 cells.

209           The experiments designed to test whether Trp or BA could stimulate ABCB4  
210 or PIN2 transport activity also tested whether these compounds sometimes used as  
211 control treatments in auxin research were transport substrates. They were not.  $E_{rev}$   
212 did not significantly shift when 0.1  $\mu$ M IAA was replaced with  $10^4$ -fold higher  
213 concentrations (1 mM) of Trp or BA (Supplemental Figure 1). The proteins  
214 transported IAA<sup>-</sup> but not Trp or BA.

#### 215 *NPPB but not NPA inhibits ABCB4 and PIN2 activity*

216 NPPB is used to block anion channels including those encoded by mammalian ABC  
217 transporters (Wang et al., 2005; Csanády and Töröcsik, 2014), and it reversibly  
218 blocks Cl<sup>-</sup>-permeable channels in the Arabidopsis plasma membrane (Cho and  
219 Spalding, 1996). It displays a half-inhibition concentration of approximately 5  $\mu$ M  
220 (Noh and Spalding, 1998). The Arabidopsis *ABCB19* gene was originally isolated by  
221 screening for NPPB-induced genes (Noh et al., 2001). *ABCB19* was shown to  
222 possess NPPB-inhibited activity when expressed in HEK cells and studied with the  
223 patch-clamp methods used in the present study (Cho et al., 2014). NPPB also blocks  
224 polar auxin transport in roots as effectively as null *abcb19* mutations (Cho et al.,  
225 2014). Consistent with these results, 20  $\mu$ M NPPB completely blocked ABCB4  
226 channel activity (Figure 6C). The chemical *N*-1-naphthylphthalamic acid (NPA) is  
227 widely used in the low micromolar range to inhibit polar auxin transport and has  
228 been reported to bind to *ABCB19* (Kim et al., 2010) but it did not inhibit *ABCB19*  
229 activity assayed by patch clamping in HEK cells (Cho et al., 2014). Figure 6C shows  
230 that 10  $\mu$ M NPA did not inhibit ABCB4 activity either. The same pharmacological

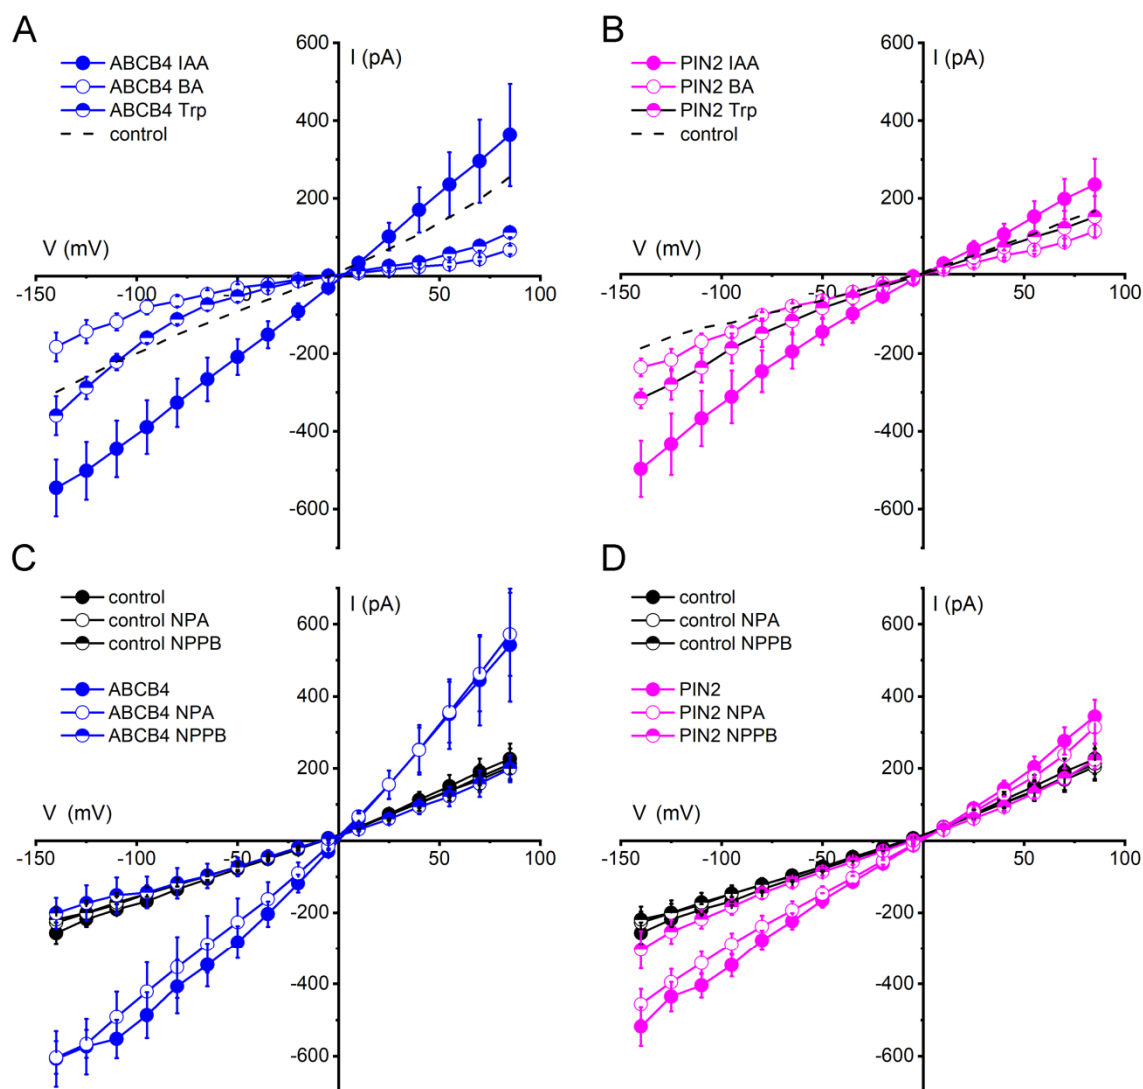

**Figure 6.** Activation specificity and pharmacology of ABCB4 and PIN2 activity. **A**, The indole-based amino acid Trp nor the aromatic benzoic acid (BA) activates ABCB4 similarly to IAA. The dashed line shows the 0.1 μM IAA ABCB4 baseline copied from Figure 5A. **B**, Same as A but for PIN2. The dashed line shows the 0.1 μM IAA PIN2 baseline copied from Figure 5B. **C**, ABCB4 activity in auxin-stimulated conditions is blocked by 20 μM NPPB but not 10 μM NPA applied by switching the bath solution. Neither treatment significantly affected the control cell currents. **D**, Same as C but for PIN2. Plotted is mean current ± SE at each voltage for n = 4 or 6 independent cells for each treatment. The pipette and bath contained 50 mM CsCl. Untreated control cell data are replotted from Figure 5A.

231 profile was observed for PIN2. The anion-channel blocker NPPB but not NPA  
 232 inhibited PIN2-mediated currents (Figure 6C,D). The lack of an inhibitory effect of  
 233 NPA on PIN2-mediated currents carrying IAA<sup>-</sup> is consistent with a recent report  
 234 (Abas et al., 2021) that NPA binds to PIN proteins at a dimerization interface,  
 235 suggested to be “distinct from IAA substrate-binding sites” and therefore probably



236 not part of the transport pathway within the protein. HEK cells possess an anion  
237 channel that could potentially confound the heterologous expression approach used  
238 in the present study. However, the HEK cell must be swelled in hypotonic  
239 conditions to observe this endogenous activity and 100  $\mu$ M NPPB is required to  
240 suppress it (Hélix et al., 2003). Therefore, this endogenous volume-regulated anion  
241 channel (VRAC) is an unlikely contributor to the present results, which we ascribe to  
242 the expression of ABCB4 or PIN2.

243 The Supplemental Dataset 1 contains the 191 individual I-V data sets, each an  
244 independent trial obtained from a separate HEK cell, used to generate the results in  
245 Figures 1-6.

#### 246 *Biophotonic assay of ABCB4-PIN2 interaction*

247 The increase in IAA<sup>-</sup> selectivity detected when ABCB4 and PIN2 were co-expressed  
248 may be the result of a physical interaction. In order to investigate a potential  
249 interaction between ABCB4 and PIN2 in a live-cell system, fluorescent ABCB4-CFP  
250 and PIN2-YFP fusion proteins were co-expressed in HEK cells and tobacco  
251 (*Nicotiana benthamiana*) leaf epidermal cells. Figure 7 shows that the efficiency of  
252 Förster resonance energy transfer (FRET) from the CFP to the YFP, which requires  
253 molecular-scale proximity of the two fluorophores, was greater than that obtained  
254 with free CFP and YFP. The efficiency of FRET between ABCB4 and PIN2 shown in  
255 Figure 7 is low compared to FRET between subunits comprising amino-acid gated  
256 Ca<sup>2+</sup> channels known as GLRs recorded in the same experimental system (Vincill et  
257 al., 2013). Nonetheless, the FRET efficiency was significantly above background in  
258 both plant and animal cell membranes, and therefore provides some support to the  
259 electrophysiological evidence of interaction (Figures 2-4). FRET between ABCB4  
260 and PIN2 was not enhanced by treating the cells with IAA. Treatment with NPPB  
261 may have weakened the interaction between the two proteins as the FRET signal in  
262 NPPB-treated leaves was not different from the free CFP/YFP control.

263 Supplemental Figure 2 shows an image of a HEK cell expressing ABCB4-CFP  
264 and PIN2-YFP obtained during the course of a FRET assay. The figure indicates the  
265 plasma membrane region in which FRET was quantified and the effects of

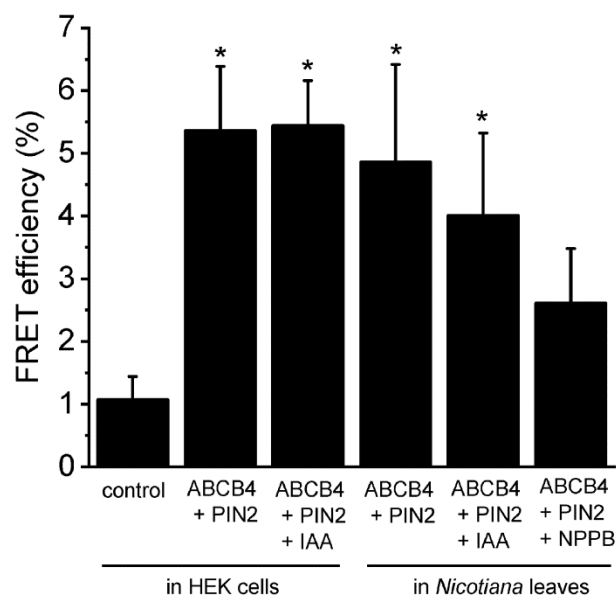

**Figure 7.** FRET assay of interaction between ABCB4 and PIN2 co-expressed in HEK cells or *Nicotiana benthamiana* leaf epidermal cells. Mean FRET efficiencies  $\pm$  SE were quantified after photobleaching the acceptor. Control (n = 7), ABCB4-CFP:PIN2-YFP in HEK cells (n = 14), ABCB4-CFP:PIN2-YFP in HEK cells with 1 mM IAA (n = 24), ABCB4-CFP:PIN2-YFP in *N. benthamiana* (n = 8), B4-CFP:PIN2-YFP in *N. benthamiana* with 1 mM IAA (n = 6) and ABCB4-CFP:PIN2-YFP in *N. benthamiana* with 20  $\mu$ M NPPB (n = 4). Asterisks indicate values that are different to a statistically significant degree from the control ( $p = 0.05$ ) as determined by T-tests. The control represents the amount of FRET between free CFP and YFP.

266 photobleaching the YFP acceptor. Supplemental Dataset 2 shows the pre-bleach and  
267 post-bleach fluorescence intensities from each of the fluorophores for every trial  
268 that generated data shown in Figure 7. The data show that ABCB4-CFP and PIN2-  
269 YFP signal levels were similar, indicating similar concentrations of the two proteins  
270 at the membrane. The data also show that in most cases, fluorescence intensity  
271 from the donor (CFP) increased following photobleaching of the acceptor (YFP),  
272 which is an indicator of genuine FRET.  
273



## 274 Discussion

275 Mathematical modeling indicated that the difference in IAA<sup>-</sup> permeability between  
276 opposite cell ends required to produce the measured rate and directional bias of  
277 auxin transport through oat coleoptiles should be approximately two-fold  
278 (Goldsmith et al., 1981; Mitchison, 1981). Figures 3,4 and 7 present evidence that  
279 co-expressed ABCB4 and PIN2 interact, to some extent physically, to create a  
280 conductance that selects IAA<sup>-</sup> approximately two-fold better than does either  
281 protein separately. Ionic currents conducted by the combination of ABCB4 and  
282 PIN2 would be enriched two-fold for IAA<sup>-</sup> relative to currents conducted by either  
283 single protein. This enrichment would be localized to regions of PIN2 expression,  
284 leading to polarized efflux of auxin from each cell and thus directionally biased  
285 auxin flow through the tissue.

286 A mechanism for polarized auxin efflux that depends on ABCB and PIN  
287 proteins combining to produce an enhanced function would explain why the *twisted*  
288 *dwarf 1* mutation, which prevents ABCB proteins from reaching the plasma  
289 membrane (Wu et al., 2010), disrupts polar auxin transport even though PIN protein  
290 localization is normal (Bouchard et al., 2006; Wang et al., 2013). The mechanism  
291 proposed here also explains why individual *abcb* mutations impair polar auxin  
292 transport as severely as *pin* mutations (Gälweiler et al., 1998; Noh et al., 2001; Lewis  
293 et al., 2007). Certainly, PINs direct auxin flow in plants (Wiśniewska et al., 2006).  
294 The present results explain why ABCB proteins are also needed.

295 Many important details remain to be discovered or clarified. A better  
296 understanding of the nature of the interaction between ABCB and PIN proteins may  
297 indicate how the pair selects better for IAA<sup>-</sup>. The FRET efficiency measurements  
298 (Figure 7) indicate that the two proteins were close enough often enough to allow a  
299 resonance process to transfer excitation energy between them. More and different  
300 types of experiments are needed to determine if a complex of ABCB and PIN  
301 proteins is an accurate model for the efflux transporter that produces the polar  
302 auxin transport phenomenon. A physical interaction between ABCB19/PGP19 and  
303 PIN1 strong enough to enable coimmunoprecipitation of the pair was reported  
304 (Blakeslee et al., 2007). Mravec et al. (2008) based on different evidence concluded

305 that ABCBs and PINs “interact intermolecularly at the PIN-containing polar domain.”  
306 Thus, multiple lines of evidence support a functional and apparently physical  
307 interaction between ABCB4 and PIN2.

308       Until heterologously expressed and studied by patch clamp  
309 electrophysiology, it was not known that plant ABCB proteins could conduct ions  
310 across the membrane. The first demonstration of such activity was achieved with  
311 Arabidopsis ABCB19. Because this activity was in some respects novel, it was  
312 important to test for explanations based on artifacts. For example, could ABCB19 in  
313 the membrane of the HEK cell have increased the activity of a channel native to the  
314 HEK cell? Arguing against this possibility is that expressing ABCB19 containing a  
315 missense mutation known to create a null phenotype in Arabidopsis did produce  
316 any ion transport activity in the HEK cell (Cho et al., 2014). Co-expressing ABCB19  
317 and the TWD1 chaperone, rather than leading to greater activity as hoped, produced  
318 none (Cho et al., 2014). These results indicate that the plant protein did not in some  
319 nonspecific way cause the HEK cell to produce a new activity much larger than  
320 background. The present study adds more reasons to trust that the activities  
321 measured are not artifacts. For example, ABCB4 activity was specifically enhanced  
322 by auxin, which would not be expected of an endogenous HEK cell transporter. The  
323 transporters are more selective for IAA<sup>-</sup> than Cl<sup>-</sup>, Trp, or BA (Figures 3,4;  
324 Supplemental Figure 1) which would not be expected of a mammalian transporter.  
325 These are reasons to trust that the expression system produces a valid  
326 representation of the plant protein’s natural function. Therefore, it is necessarily  
327 the case that ABCB4 and PIN2 transport numerous more inorganic ions such as Cl<sup>-</sup>  
328 per unit time across the plant cell plasma membrane than IAA<sup>-</sup> because the  
329 concentration of auxin (~μM) is at least one thousand-fold lower than the  
330 cytoplasmic concentrations of Cl<sup>-</sup> and other potentially permeant substrates (~mM).  
331 Thus, IAA<sup>-</sup> is among the ions the auxin efflux machinery allows to move  
332 thermodynamically ‘downhill’ across the plasma membrane.

333       Another plant membrane protein that transports an organic anion also  
334 transports Cl<sup>-</sup>. It is the ALMT1 malate transporter, which is activated by Al<sup>3+</sup> and  
335 negatively regulated by gamma-aminobutyric acid (Piñeros et al., 2008; Ramesh et

336 al., 2015). As more plant proteins expected to transport organic compounds are  
337 studied electrophysiologically in heterologous systems, more may be found to also  
338 transport inorganic ions. The inevitably mixed-ion current conducted by an auxin-  
339 efflux activity comprised of ABCB4 and PIN2 may be physiologically important. It  
340 may provide cells with a physiological mechanism for sensing IAA<sup>-</sup> flux, which is a  
341 parameter in some models of auxin transport-mediated development (Kramer,  
342 2008; Stoma et al., 2008; Prusinkiewicz et al., 2009; Shinohara et al., 2013) despite  
343 no generally recognized notion of how a cell could measure it. A mixed ion current  
344 would depolarize the plasma membrane, i.e. shift the membrane potential to more  
345 positive values. If interaction between ABCB and PIN increases selectivity for IAA<sup>-</sup>,  
346 the depolarizing effect of nonselective currents may be reduced. The downstream  
347 (PIN-containing) end of an auxin-transporting cell may have a more negative  
348 membrane potential than the upstream end. This cellular electrical polarity will be  
349 proportional to the magnitude of polar auxin flux. Spatial differences in membrane  
350 potential can drive current loops, long associated with morphogenesis (Jaffe and  
351 Nuccitelli, 1977; Hotary and Robinson, 1990; Léonetti et al., 2004; Adams and Levin,  
352 2013). We suggest that electrical consequences of an auxin efflux activity comprised  
353 of ABCB and PIN proteins could form the basis of an auxin flux sensor at the cellular,  
354 tissue, and organ levels. Manipulation of PIN localization followed by investigations  
355 of microscopic and macroscopic electrical gradients could test this idea.

356 Auxin stimulation of ABCB4 activity, especially if it occurs in other members  
357 of the ABCB family, would also contribute to the positive reinforcement of auxin  
358 transport by auxin transport itself. Self-strengthening auxin transport is a key  
359 feature of canalization, the phenomenon thought to create auxin distribution  
360 patterns that guide many aspects of development (Stoma et al., 2008; Sauer et al.,  
361 2006; Bennett et al., 2014). The present findings of auxin-stimulated ABCB4  
362 transport activity and increased selectivity due to ABCB4 and PIN2 interactions  
363 would augment auxin promotion of PIN expression that is believed to result in  
364 canalization (Kramer, 2008; Bayer et al., 2009; Smith and Bayer, 2009; van Berkel et  
365 al., 2013).

366           The results reported here establish a new category of evidence indicating  
367 that ABCB4 and PIN2 directly transport IAA<sup>-</sup> across a cell membrane. The results  
368 are based on voltage-clamp measurements of charge movement and membrane  
369 transport theory. Because the patch clamp method controls the fundamental  
370 parameters governing transport while it directly measures charge movement, it  
371 could be the most appropriate method for investigating structure-function  
372 relationships of auxin transporters. Other ABCB proteins to be studied with this  
373 method include ABCB1, ABCB6, ABCB19, and ABCB20 because they have each been  
374 shown to play a role in auxin transport through tissues (Noh et al., 2001; Yang et al.,  
375 2018). One structure-function question to address is whether or not the proposed  
376 IAA binding sites in ABCB4 (Yang et al., 2009) are responsible for auxin activation of  
377 its transport function (Figure 5A). Another is the role of predicted NPA binding  
378 sites (Kim et al., 2010) in channel function. The measurement platform could also  
379 be used to investigate the regulatory effects of co-expressed kinases (van Berkel et  
380 al., 2013; Zourelidou et al., 2014; Weller et al., 2017). Especially important will be  
381 biophysical investigations of how apparently new properties such as enhanced  
382 selectivity result from interaction of ABCB4 and PIN2, which may be the basis of the  
383 synergistic auxin transport Blakeslee et al. (2007) reported. The phenomenon may  
384 be analogous to the interaction between mammalian ABCC8 and the Kir6 (K<sub>ATP</sub>)  
385 potassium channel which results in regulation not evident in either individual  
386 protein (Bryan and Aguilar-Bryan, 1999; Burke et al., 2008). All of the above would  
387 benefit from improvements to the platform such as increasing expression of the  
388 plant proteins in HEK cells and finding ways to achieve greater than 1 mM IAA in the  
389 pipette. The former would increase the activity to be measured and the latter would  
390 create larger shifts in E<sub>rev</sub> and therefore increase the precision with which IAA<sup>-</sup>  
391 selectivity could be measured. The resulting improved understanding of how auxin  
392 transport proteins create directionally biased, self-reinforcing auxin flow would  
393 lead to more accurate mechanistic models of how auxin influences plant growth and  
394 development.

395

396 **Materials and Methods**

397 *HEK cell culture and transfection*

398 HEK293T cells from American Type Culture Collection were cultured in Dulbecco's  
399 modified Eagle's medium-GlutaMAX (Invitrogen) with 10% fetal bovine serum, 100  
400 IU mL<sup>-1</sup> penicillin, and 100 µg mL<sup>-1</sup> streptomycin in an incubator set at 37 °C with  
401 95% air and 5% CO<sub>2</sub>. Prior to transfection, trypsin-treated HEK293T cells (5 x 10<sup>5</sup>  
402 cells per well) were plated into six-well tissue culture plates containing collagen-  
403 coated glass cover slips 12 to 24 h before being transfected with 1 µg of the  
404 indicated plasmid DNA using FuGENE 6 transfection reagent (Promega) following  
405 the manufacturer's protocol. In the case of cotransfections, a plasmid ratio of 1:1  
406 (0.5 µg + 0.5 µg) was used. All experiments were performed 36 to 48 h after  
407 transfection and imaged live at room temperature.

408 *DNA cloning*

409 For HEK293T cell expression and electrophysiology experiments, full length *ABCB4*  
410 and *PIN2* cDNA was amplified from total RNA by RT-PCR as described in Vincill et al.  
411 (2012) using the following primers: 5'-ATCTGTCGACATGGCTTCAGAGA GCGGCTTA-  
412 3' and 5'-AATTCCCGGGTCAAGAAGCCGCGGTT-3'. PCR products were then digested  
413 and inserted into the Sall and XmaI sites of the pIRES-Enhanced Green Fluorescent  
414 Protein (EGFP) bicistronic vector used by Vincill et al. (2012) such that a single  
415 mRNA would separately code *ABCB4* and EGFP. *PIN2* was amplified from cDNA  
416 template using the following primers: 5'-TATTTGTCGACATGATCACCGGCAAA GAC-  
417 3' and 5'-ATCACCGGGTTAAAGCCCCAAAAGAAC-3'. PCR products were digested  
418 and inserted into the Sall and XmaI sites of the pIRES2-DsRed bicistronic vector.

419 For FRET analysis in HEK293T cells, *ABCB4* cDNA was amplified using the  
420 following primers to include the CACC Gateway modification on the forward primer:  
421 5'-CACCATGGCTTCAGAGAGCGGC-3' and 5'-AGAAGCCGCGGTTAGATGAAGC-3'. *PIN2*  
422 cDNA was amplified using the following primers: 5'-CACCATGATCACCGGCAAAGAC  
423 ATGTAC-3' and 5'-AAGCCCCAAAAGAACGTAGTACAGTAC-3'. The resulting PCR  
424 fragments were cloned into the pENTR-D entry vector (Invitrogen). The pENTR-D  
425 vectors containing the respective full-length *ABCB4* or *PIN2* cDNAs were shuttled  
426 into the pDS\_EF1-XB-CFP (*ABCB4*) and pDS\_EF1-XB-YFP (*PIN2*) mammalian

427 expression vectors from American Type Culture Collection using the Gateway  
428 recombination reaction (Invitrogen) to generate C-Terminally tagged fusion  
429 proteins.

430 For FRET experiments in *Nicotiana benthamiana*, the pENTR-D vectors  
431 described above containing *ABCB4* and *PIN2* cDNA were shuttled into the Gateway  
432 destination vectors pEARLEYGATE 101(CFP) and pEARLEYGATE 102(YFP)  
433 respectively, which fuse the indicated fluorescent tag to the C-terminus of the  
434 translated gene product to generate Pro35S:PIN2-YFP and Pro35S:ABCB4-CFP  
435 constructs. The tobacco leaf infiltration method was used to transiently express the  
436 constructs. All constructs were confirmed by DNA sequencing.

#### 437 *Electrophysiology*

438 For whole-cell recording, a coverslip with cells was placed in a recording chamber  
439 mounted on the fixed stage of an upright fluorescence microscope (Olympus  
440 BX51WI) mounted on an antivibration table equipped with a micromanipulator that  
441 controlled the head stage of the patch-clamp amplifier (Axopatch 200A; Molecular  
442 Devices;www.moleculardevices.com). A 40x dipping objective lens was used to  
443 view the cells in bright-field or fluorescence mode in the chamber, which was being  
444 continuously perfused with a bath solution containing 140 mM CsCl, 2 mM CaCl<sub>2</sub>, 2  
445 mM MgCl<sub>2</sub>, 5 mM KCl, and 10 mM HEPES, adjusted to pH 6 with CsOH. The pipette  
446 was filled with 140 mM CsCl, 1 mM CaCl<sub>2</sub>, 2 mM MgCl<sub>2</sub>, 5 mM EGTA, 10 mM D-Glc, 10  
447 mM HEPES, and 3 mM Mg-ATP, adjusted to pH 7.2 with CsOH. For experiments  
448 using 50 mM CsCl, 190 mM sorbitol was added to maintain osmolarity. Bath  
449 solutions containing only 14 mM CsCl solutions were supplemented with 252 mM  
450 sorbitol. Cells displaying strong EGFP or DsRed fluorescence were selected for  
451 whole-cell patch-clamp analysis using micropipettes pulled from borosilicate glass.  
452 Micropipette resistance was between 5 and 8 megaohms when filled. After  
453 achieving a gigaohm seal, the patch was ruptured to obtain the whole-cell  
454 configuration. After the baseline current stabilized, a voltage clamp protocol was  
455 administered by pCLAMP 10.2 software (Molecular Devices). The measured  
456 membrane currents were low-pass filtered at 5 kHz and digitized at 10 kHz using a



457 Digidata 1440A device (Molecular Devices). Data analysis was performed with  
458 Clampfit 10.2 (Molecular Devices) software.

#### 459 *Plant materials and growth conditions*

460 The Columbia-0 ecotype of *Arabidopsis thaliana* was the wild type used in this study,  
461 and the genetic backgrounds of the mutant and transgenic lines employed were as  
462 follows: *abcb4-2*, a transfer DNA insertion allele with a null phenotype<sup>36</sup> and the  
463 *eir1-1* allele, a R1013K substitution in *PIN2* caused by a G-to-A mutation at position  
464 +3038 (Roman et al., 1995). The *eir1-1;abcb4-2* double mutant was generated by  
465 crossing *abcb4-2* into *eir1-1* and a line homozygous for both mutations was verified  
466 using PCR. WT primers for ABCB4 genomic DNA were as follows: 5'-  
467 GCGCAATACCTCTTTGGTTCATTA ACT-3' and 5'-  
468 GCGCATCATCCAACACTCTTCCTGATT-3'. The T-DNA Lb1a primer 5'-  
469 TGGTTCACGTAGTGGGCCATCG-3' and ABCB4 genomic DNA primer 5'-  
470 GCGCAATACCTCTTTGGTTCATTA ACT-3' were used to screen for *abcb4-2*. Derived  
471 cleaved amplified polymorphic sequence (dCAPS) PCR was used to screen for *eir1-1*.  
472 Primers were as follows: 5'-TGATGTTGTTGATCATTTTATGGGACC-3', which  
473 introduced an AgeI restriction site in WT EIR1 gDNA but not *eir1-1*, and 5'-  
474 CCTTAGGGCCATCGCAAACCC-3'. Resulting PCR products were digested with AgeI to  
475 identify lines that were homozygous for *eir1-1*. Seeds were sown on the surface of  
476 petri plates containing 0.8% phytoagar supplemented with one-half-strength  
477 Murashige and Skoog (MS) medium containing 2.15 g L<sup>-1</sup> MS nutrient mix (Sigma-  
478 Aldrich), 1% (w/v) Sucrose, and 0.5 g L<sup>-1</sup> MES, adjusted to pH 5.7 with KOH. For  
479 gravitropism studies, plates containing seeds were maintained at 4°C for at least 2 d.  
480 After this stratification treatment, plates were placed vertically at 23°C under a 16-  
481 h-light/8-h-dark photoperiod for 96 h.

#### 482 *Gravitropism and growth rate*

483 Seedlings for these assays were grown on petri plates containing the media  
484 described above. Plates were rotated 90° with respect to the gravitational vector  
485 and digital images were automatically collected every 2 min for 8 h using a bank of

486 CCD cameras and infrared backlighting as described previously (Durham Brooks et  
487 al., 2010). The image files were automatically analyzed to calculate root tip angle  
488 time courses and growth rates with algorithms similar to those Durham Brooks et  
489 al. (2010) used.

#### 490 *FRET*

491 A Zeiss LSM 780 Meta confocal imaging system with a 30-mW argon laser  
492 and a 63X 1.4-numerical aperture oil immersion Plan-Apochromat objective  
493 was used to visualize live HEK293T cells or *N. benthamiana* epidermal cells  
494 coexpressing ABCB4 or PIN2 that were C-terminally tagged with CFP for ABCB4 or  
495 YFP for PIN2. FRET was measured by acceptor photobleaching (Herrick-Davis et al.,  
496 2006), with the following modifications. Prebleach CFP and YFP images were  
497 collected simultaneously following excitation at 458 nm (15% laser intensity). A  
498 selected region of interest was irradiated with the 514-nm laser line (100%  
499 intensity) using a 458-nm/514-nm dual dichroic mirror for 5 to 10 s to photobleach  
500 YFP. Postbleach CFP and YFP images were collected simultaneously immediately  
501 following photobleaching. Using ZEN vX software, FRET efficiency was measured as  
502 an increase in CFP fluorescence intensity from the ROI following YFP  
503 photobleaching and compared to an ROI selected from the background in order to  
504 account for noise. The FRET ratios at all the pixels within the region of interest  
505 were averaged to quantify the interactions of ABCB4 and PIN2 as done previously  
506 for glutamate receptor ion channel subunits (Vincill et al., 2013).

507

508

#### 509 **Acknowledgements**

510 This work was funded by NSF grant IOS-1360751 to E.P.S.

#### 511 **Author Contributions**

512 Edgar Spalding and Stephen Deslauriers designed the research; Stephen Deslauriers  
513 performed the experiments; Stephen Deslauriers and Edgar Spalding analyzed the  
514 data; Edgar Spalding and Stephen Deslauriers wrote the paper.



515

## 516 **Figure Legends**

517 **Figure 1.** Electrogenic activities of ABCB4 and PIN2 proteins expressed in HEK  
518 cells. **A**, Diagram of the whole-cell patch clamp technique employing Cs<sup>+</sup> and Cl<sup>-</sup> as  
519 principal charge carriers. The amplifier controlled (clamped) the membrane  
520 potential (V) while the transmembrane electric currents (I) were measured. The  
521 cells were transfected with a vector carrying only EGFP or DsRED cDNA (control),  
522 ABCB4 and EGFP cDNA in separate reading frames, or PIN2 and DsRED cDNA in  
523 separate reading frames. **B**, Example recordings of transmembrane currents elicited  
524 by step-wise changes in V recorded from control cells and cells transfected with  
525 ABCB4 or PIN2. **C**, I versus V curves represent mean current ± SE at each membrane  
526 potential measured in control cells (n = 5), ABCB4-expressing cells (n = 6), and  
527 PIN2-expressing cells (n = 6). The pipette and bath solutions contained 140 mM  
528 CsCl.

529 **Figure 2.** Anion preferences ABCB4, PIN2, and co-expressed ABCB4 and PIN2  
530 transport activities demonstrated by current-voltage analysis. **A**, ABCB4 and control  
531 cell I-V relationships recorded with 140 mM CsCl in the bath and pipette  
532 (symmetrical) and after switching the bath to 14 mM CsCl (asymmetrical). The  
533 average membrane potentials at which I=0 (reversal potential) for each condition  
534 are shown. Plotted are the mean currents ± SE at each voltage obtained from 4  
535 separate cells for each condition. Positive changes in reversal potential indicate  
536 preference for Cl<sup>-</sup> over Cs<sup>+</sup>. **B**, same as A but for cells expressing PIN2. The control  
537 cell curves are re-plotted from A. **C**, same as B but for cells co-expressing ABCB4 and  
538 PIN2. **D**, ABCB4-, PIN2-, and ABCB4+PIN2-dependent I-V curves were generated  
539 from the data in A-C by subtracting average control currents from each. The Cl<sup>-</sup> to  
540 Cs<sup>+</sup> permeability ratios (P<sub>Cl</sub>:P<sub>Cs</sub>) derived from the reversal potentials of these curves  
541 are included in the plot.

542 **Figure 3.** IAA<sup>-</sup> permeability demonstrated by current-voltage analysis. **A**, I-V curves  
543 obtained in symmetrical 50 mM CsCl conditions with 0.1 μM IAA in the pipette, i.e.  
544 on the cytoplasmic side. **B**, I-V curves obtained as in A but with 1 mM IAA in the

545 pipette. The number of independent cells measured per condition was between 4  
546 and 14. **C**, Reversal potentials ( $E_{rev}$ ) of I-V curves obtained with either 0.1  $\mu$ M IAA  
547 (low) or 1 mM IAA (high) in the pipette. **D**, Differences in  $E_{rev}$  ( $\Delta E_{rev}$ ) due to a change  
548 in the IAA gradient. T-tests were performed. ns = no statistical significance, \* =  
549  $p < 0.05$ , \*\* =  $p < 0.01$ .

550 **Figure 4.** ABCB4 and PIN2 are highly selectivity for IAA<sup>-</sup> over Cl<sup>-</sup>, and the selectivity  
551 approximately doubles when the two are co-expressed. The Goldman-Hodgkin-Katz  
552 model of membrane transport was parameterized with values of ( $P_{Cl}$ ) relative to Cs<sup>+</sup>  
553 permeability ( $P_{Cs}$ ) calculated from the results in Figure 2D to determine the  
554 permeability of IAA<sup>-</sup> relative to Cl<sup>-</sup> ( $P_{IAA} : P_{Cl}$ ) based on the  $\Delta E_{rev}$  values presented in  
555 Figure 3D.

556 **Figure 5.** Effects of auxin on transport activity of ABCB4 and PIN2. **A**, I-V  
557 relationships for ABCB4 obtained with different concentrations of IAA<sup>-</sup> in the  
558 pipette. **B**, I-V curves for PIN2 obtained with different concentrations of IAA<sup>-</sup> in the  
559 pipette. The pipette and bath solutions contained 50 mM CsCl. The same control  
560 data are plotted in A and B, the 0.1  $\mu$ M IAA and 1 mM IAA data are replotted from  
561 Figure 3. The 1  $\mu$ M IAA data are mean currents  $\pm$  SE obtained from n= 6 control cells,  
562 n=4 ABCB4 cells, and n=5 PIN2 cells.

563 **Figure 6.** Activation specificity and pharmacology of ABCB4 and PIN2 activity. **A**,  
564 The indole-based amino acid Trp nor the aromatic benzoic acid (BA) activates  
565 ABCB4 similarly to IAA. The dashed line shows the 0.1  $\mu$ M IAA ABCB4 baseline  
566 copied from Figure 5A. **B**, Same as A but for PIN2. The dashed line shows the 0.1  $\mu$ M  
567 IAA PIN2 baseline copied from Figure 5B. **C**, ABCB4 activity in auxin-stimulated  
568 conditions is blocked by 20  $\mu$ M NPPB but not 10  $\mu$ M NPA applied by switching the  
569 bath solution. Neither treatment significantly affected the control cell currents. **D**,  
570 Same as C but for PIN2. Plotted is mean current  $\pm$  SE at each voltage for n = 4 or 6  
571 independent cells for each treatment. The pipette and bath contained 50 mM CsCl.  
572 Untreated control cell data are replotted from Figure 5A.

573 **Figure 7.** FRET assay of interaction between ABCB4 and PIN2 co-expressed in HEK  
574 cells or *Nicotiana benthamiana* leaf epidermal cells. Mean FRET efficiencies  $\pm$  SE  
575 were quantified after photobleaching the acceptor. Control (n = 7), ABCB4-  
576 CFP:PIN2-YFP in HEK cells (n = 14), ABCB4-CFP:PIN2-YFP in HEK cells with 1 mM  
577 IAA (n = 24), ABCB4-CFP:PIN2-YFP in *N. benthamiana* (n = 8), B4-CFP:PIN2-YFP in  
578 *N. benthamiana* with 1 mM IAA (n = 6) and ABCB4-CFP:PIN2-YFP in *N. benthamiana*  
579 with 20  $\mu$ M NPPB (n = 4). Asterisks indicate values that are different to a  
580 statistically significant degree from the control (p = 0.05) as determined by T-tests.  
581 The control represents the amount of FRET between free CFP and YFP.

582  
583 **Supplemental Figure 1.** Tryptophan and benzoic acid are not transported by  
584 ABCB4 or PIN2 according to reversal potential analysis. A, Average  $E_{rev}$  values  
585 obtained in each of the indicated conditions. B, The change in  $E_{rev}$  due to changing  
586 intracellular 0.1  $\mu$ M IAA with each of the indicated test substrates. Only when 0.1  $\mu$ M  
587 IAA was changed to 1 mM IAA was the change in  $E_{rev}$  statistically significant, as  
588 indicated by the asterisks (p=0.05).

589  
590

591 **Supplemental Figure 2.** Confocal fluorescence micrographs of live HEK cells  
592 expressing ABCB4-CFP (a,e) and PIN2-YFP (b,f) before (a,b) and after (e,f) the  
593 region of interest marked by a red line was photobleached. Overlaying the CFP and  
594 YFP panels (c,g) shows an increase in CFP fluorescence following photobleaching,  
595 indicative of pre-bleaching quenching of ABCB4-CFP fluorescence by PIN2-YFP  
596 protein. Panels d and h show an enlarged view of the region of interest before and  
597 after photobleaching of the YFP.

598 **Supplemental Dataset 1.** All of the current-voltage (I-V) curves are contained in  
599 one comma separated value (csv) file. The results are grouped by the figure in which  
600 the mean values appear. All of the electrophysiology results in the paper can be  
601 reconstructed from these patch clamp trials.

602

603 **Supplemental Dataset 2.** All of the individual FRET efficiency values used to create  
604 the means in Fig. 5 are assembled in on comma separated value file. The file also  
605 contains the donor (CFP) and acceptor (YFP) fluorescence intensities obtained  
606 before and after photobleaching of the acceptor fluorophore.

607

608

## Parsed Citations

- Abas L, Benjamins R, Malenica N, Paciorek T, Wiśniewska J, Moulinier-Anzola JC, Sieberer T, Friml J, Luschig C (2006) Intracellular trafficking and proteolysis of the Arabidopsis auxin-efflux facilitator PIN2 are involved in root gravitropism. *Nature Cell Biol* 8: 249-256  
Google Scholar: [Author Only](#) [Title Only](#) [Author and Title](#)
- Abas L, Kolb M, Stadlmann J, Janacek DP, Lukic K, Schwechheimer C, Sazanov LA, Mach L, Friml J, Hammes UZ (2021) Naphthylphthalamic acid associates with and inhibits PIN auxin transporters. *Proc Natl Acad Sci* 118: (1) e2020857118.  
Google Scholar: [Author Only](#) [Title Only](#) [Author and Title](#)
- Adams DS, Levin M (2013) Endogenous voltage gradients as mediators of cell-cell communication: strategies for investigating bioelectrical signals during pattern formation. *Cell Tissue Res* 352: 95–122  
Google Scholar: [Author Only](#) [Title Only](#) [Author and Title](#)
- Ambudkar SV, Kimchi-Sarfaty C, Sauna ZE, Gottesman MM (2003) P-glycoprotein: from genomics to mechanism. *Oncogene* 22: 7468-85  
Google Scholar: [Author Only](#) [Title Only](#) [Author and Title](#)
- Band LR, Wells DM, Fozard JA, Ghetiu T, French AP, Pound MP, Wilson MH, Yu L, Li W, Hijazi HI, Oh J, Pearce SP, Perez-Amador MA, Yun J, Kramer E, Alonso JM, Godin C, Vernoux T, Hodgman TC, Pridmore TP, Swarup R, King JR, Bennett MJ (2014) Systems analysis of auxin transport in the Arabidopsis root apex. *Plant Cell* 26: 862-875  
Google Scholar: [Author Only](#) [Title Only](#) [Author and Title](#)
- Bayer EM, Smith RS, Mandel T, Nakayama N, Sauer M, Prusinkiewicz P, Kuhlemeier C (2009) Integration of transport-based models for phyllotaxis and midvein formation. *Genes & Dev* 23: 373-384  
Google Scholar: [Author Only](#) [Title Only](#) [Author and Title](#)
- Bennett T, Hines G, Leyser O (2014) Canalization: what the flux? *Trends Genet* 30: 41-48  
Google Scholar: [Author Only](#) [Title Only](#) [Author and Title](#)
- Blakeslee JJ, Bandyopadhyay A, Lee OR, Mravec J, Titapiwatanakun B, Sauer M, Makam SN, Cheng Y, Bouchard R, Adamec J, Geisler M, Nagashima A, Sakai T, Martinoia E, Friml J, Peer WA, Murphy AS (2007) Interactions among PIN-FORMED and P-glycoprotein auxin transporters in Arabidopsis. *Plant Cell* 19: 131-147  
Google Scholar: [Author Only](#) [Title Only](#) [Author and Title](#)
- Bouchard R, Bailly A, Blakeslee JJ, Oehring SC, Vincenzetti V, Lee OR, Paponov I, Palme K, Mancuso S, Murphy AS, Schulz B, Geisler M (2006) Immunophilin-like TWISTED DWARF1 modulates auxin efflux activities of Arabidopsis P-glycoproteins. *J Biol Chem* 281: 30603–30612  
Google Scholar: [Author Only](#) [Title Only](#) [Author and Title](#)
- Bryan J, Aguilar-Bryan L (1999). Sulfonylurea receptors: ABC transporters that regulate ATP-sensitive K<sup>+</sup> channels. *Biochimica et Biophysica Acta (BBA) – Biomembranes* 1858: 2959-3204  
Google Scholar: [Author Only](#) [Title Only](#) [Author and Title](#)
- Burke MA, Mutharasan RK, Ardehali H (2008) The sulfonylurea receptor, an atypical ATP-binding cassette protein, and its regulation of the KATP channel. *Circul Res* 102: 164-176  
Google Scholar: [Author Only](#) [Title Only](#) [Author and Title](#)
- Chen R, Hilson P, Sedbrook J, Rosen E, Caspar T, Masson PH (1998) The Arabidopsis thaliana AGRATROPIC 1 gene encodes a component of the polar-auxin-transport efflux carrier. *Proc Natl Acad Sci USA* 95: 15112–15117  
Google Scholar: [Author Only](#) [Title Only](#) [Author and Title](#)
- Cho M, Henry EM, Lewis DR, Wu G, Muday GK, Spalding EP (2014) Block of ATP-Binding Cassette B19 ion channel activity by 5-nitro-2-(3-phenylpropylamino)-benzoic acid impairs polar auxin transport and root gravitropism. *Plant Physiol* 166: 2091-2099  
Google Scholar: [Author Only](#) [Title Only](#) [Author and Title](#)
- Cho M, Lee SH, Cho HT (2007) P-glycoprotein4 displays auxin efflux transporter-like action in Arabidopsis root hair cells and tobacco cells. *Plant Cell* 19: 3930–3943  
Google Scholar: [Author Only](#) [Title Only](#) [Author and Title](#)
- Cho M, Lee ZW, Cho HT (2012) ATP-binding cassette B4, an auxin-efflux transporter, stably associates with the plasma membrane and shows distinctive intracellular trafficking from that of PIN-FORMED proteins. *Plant Physiol* 159: 642-54  
Google Scholar: [Author Only](#) [Title Only](#) [Author and Title](#)
- Cho MH, Spalding EP (1996) An anion channel in Arabidopsis hypocotyls activated by blue light. *Proc Natl Acad Sci USA* 93: 8134–8138  
Google Scholar: [Author Only](#) [Title Only](#) [Author and Title](#)
- Csanády L, Töröcsik B (2014) Structure–activity analysis of a CFTR channel potentiator: Distinct molecular parts underlie dual gating effects. *J Gen Physiol* 144: 321-336  
Google Scholar: [Author Only](#) [Title Only](#) [Author and Title](#)
- Dreyer I, Horeau C, Lemaillet G, Zimmerman S, Bush DR, Rodríguez-Navarro A, Schachtman DP, Spalding EP, Sentenac H, Gaber RF (1999) Identification and characterization of plant transporters using heterologous expression systems. *J. Ex. Bot.* 50: 1073-1087.  
Google Scholar: [Author Only](#) [Title Only](#) [Author and Title](#)

**Durham Brooks TL, Miller ND, Spalding EP (2010) Plasticity of Arabidopsis root gravitropism throughout a multi-dimensional condition space quantified by automated image analysis. *Plant Physiol* 152: 206-216.**

Google Scholar: [Author Only](#) [Title Only](#) [Author and Title](#)

**Fletcher JI, Haber M, Henderson MJ, Norris MD (2010) ABC transporters in cancer: more than just drug efflux pumps. *Nature Rev Cancer* 10: 147-156**

Google Scholar: [Author Only](#) [Title Only](#) [Author and Title](#)

**Gälweiler L, Guan C, Müller A, Wisman E, Mendgen K, Yephremov A, Palme K (1998) Regulation of polar auxin transport by AtPIN1 in Arabidopsis vascular tissue. *Science* 282: 2226–2230.**

Google Scholar: [Author Only](#) [Title Only](#) [Author and Title](#)

**Geisler M, Blakeslee JJ, Bouchard R, Lee OR, Vincenzetti V, Bandyopadhyay A, Titapiwatanakun B, Peer WA, Bailly A, Richards EL, Ejendal KF, Smith AP, Baroux C, Grossniklaus U, Müller A, Hrycyna CA, Dudler R, Murphy AS, Martinoia E (2005) Cellular efflux of auxin catalyzed by the Arabidopsis MDR/PGP transporter AtPGP1. *Plant J* 44: 179-194**

Google Scholar: [Author Only](#) [Title Only](#) [Author and Title](#)

**Goldsmith MHM (1977) The polar transport of auxin. *Annu Rev Plant Physiol* 28: 439–478**

Google Scholar: [Author Only](#) [Title Only](#) [Author and Title](#)

**Goldsmith MHM, Goldsmith TH, Martin MH (1981) Mathematical analysis of the chemosmotic polar diffusion of auxin through plant tissues. *Proc Natl Acad Sci USA* 78: 976–980**

Google Scholar: [Author Only](#) [Title Only](#) [Author and Title](#)

**Hélix N, Strøbaek D, Dahl B, Christophersen P (2003) Inhibition of the endogenous volume-regulated anion channel (VRAC) in HEK293 cells by acidic di-aryl-ureas. *J Membr Biol* 196: 83-94.**

Google Scholar: [Author Only](#) [Title Only](#) [Author and Title](#)

**Herrick-Davis K, Weaver BA, Grinde E, Mazurkiewicz JE (2006) Serotonin 5-HT<sub>2C</sub> receptor homodimer biogenesis in the endoplasmic reticulum: real-time visualization with confocal fluorescence resonance energy transfer. *J Biol Chem* 281: 27109-27116**

Google Scholar: [Author Only](#) [Title Only](#) [Author and Title](#)

**Higgins CF (1995) The ABC of channel regulation. *Cell* 82: 693-696**

Google Scholar: [Author Only](#) [Title Only](#) [Author and Title](#)

**Hille B (2001) *Ion channels of excitable membranes, 3rd ed., Sinauer Associates, Sunderland, MA***

**Hoffman MM, Wei LY, Roepe PD (1996) Are altered pH<sub>i</sub> and membrane potential in hu MDR 1 transfectants sufficient to cause MDR protein-mediated multidrug resistance? *J Gen Physiol* 108: 295-313**

Google Scholar: [Author Only](#) [Title Only](#) [Author and Title](#)

**Hotary KB, Robinson KR (1990) Endogenous electrical currents and the resultant voltage gradients in the chick embryo. *Dev Biol* 140: 149-160**

Google Scholar: [Author Only](#) [Title Only](#) [Author and Title](#)

**Jaffe LF, Nuccitelli R (1977) Electrical controls of development. *Annu Rev Biophys Bioeng* 6: 445-476**

Google Scholar: [Author Only](#) [Title Only](#) [Author and Title](#)

**Kamimoto Y, Terasaka K, Hamamoto M, Takanashi K, Fukuda S, Shitan N, Sugiyama A, Suzuki H, Shibata D, Wang B, Pollmann S, Geisler M, Yazaki K (2012) Arabidopsis ABCB21 is a facultative auxin importer/exporter regulated by cytoplasmic auxin concentration. *Plant Cell Physiol* 53: 2090–2100**

Google Scholar: [Author Only](#) [Title Only](#) [Author and Title](#)

**Kim JY, Henrichs S, Bailly A, Vincenzetti V, Sovero V, Mancuso S, Pollmann S, Kim D, Geisler M, Nam HG (2010) Identification of an ABCB/P-glycoprotein-specific inhibitor of auxin transport by chemical genomics. *J Biol Chem* 285: 23309–23317**

Google Scholar: [Author Only](#) [Title Only](#) [Author and Title](#)

**Kramer EM (2008) Computer models of auxin transport: a review and commentary. *J Exp Bot* 59: 45-53**

Google Scholar: [Author Only](#) [Title Only](#) [Author and Title](#)

**Krecek P, Skupa P, Libus J, Naramoto S, Tejos R, Friml J, Zazimalová E (2009) The PIN-FORMED (PIN) protein family of auxin transporters. *Genome Biol* 10: 249**

Google Scholar: [Author Only](#) [Title Only](#) [Author and Title](#)

**Kubeš M, Yang H, Richter GL, Cheng Y, Młodzińska E, Wang X, Blakeslee JJ, Carraro N, Petrášek J, Zazimalová E, Hoyerová K, Peer WA, Murphy AS (2012) The Arabidopsis concentration-dependent influx/efflux transporter ABCB4 regulates cellular auxin levels in the root epidermis. *Plant J* 69: 640–654**

Google Scholar: [Author Only](#) [Title Only](#) [Author and Title](#)

**Léonetti M, Dubois-Violette E, Homblé F (2004) Pattern formation of stationary transcellular ionic currents in Fucus. *Proc Natl. Acad Sci* 101: 10243-10248**

Google Scholar: [Author Only](#) [Title Only](#) [Author and Title](#)



**Lewis DR, Miller ND, Splitt BL, Wu G, Spalding EP (2007) Separating the roles of acropetal and basipetal auxin transport on gravitropism with mutations in two Arabidopsis multidrug resistance-like ABC transporter genes. Plant Cell 19: 1838–1850**

Google Scholar: [Author Only](#) [Title Only](#) [Author and Title](#)

**Mitchison G (1981) The polar transport of auxin and vein patterns in plants. Phil. Trans. R. Soc. Lond. B 295: 461–471**

Google Scholar: [Author Only](#) [Title Only](#) [Author and Title](#)

**Mravec J, Kubes M, Bielach A, Gaykova V, Petrásek J, Skůpa P, Chand S, Benková E, Zazimalová E, Friml J (2008) Interaction of PIN and PGP transport mechanisms in auxin distribution-dependent development. Development 135: 3345–3354**

Google Scholar: [Author Only](#) [Title Only](#) [Author and Title](#)

**Noh B, Bandyopadhyay A, Peer WA, Spalding EP, Murphy AS (2003) Enhanced gravi- and phototropism in plant mdr mutants mislocalizing the auxin efflux protein PIN1. Nature 423: 999–1002**

Google Scholar: [Author Only](#) [Title Only](#) [Author and Title](#)

**Noh B, Murphy AS, Spalding EP (2001) Multidrug resistance-like genes of Arabidopsis required for auxin transport and auxin-mediated development. Plant Cell 13: 2441–2454**

Google Scholar: [Author Only](#) [Title Only](#) [Author and Title](#)

**Noh B, Spalding EP (1998) Anion channels and the stimulation of anthocyanin accumulation by blue light in Arabidopsis seedlings. Plant Physiol 116: 503–509**

Google Scholar: [Author Only](#) [Title Only](#) [Author and Title](#)

**Okada K, Ueda J, Komaki MK, Bell CJ, Shimura Y (1991) Requirement of the auxin polar transport system in early stages of Arabidopsis floral bud formation. Plant Cell 3: 677–684**

Google Scholar: [Author Only](#) [Title Only](#) [Author and Title](#)

**Petrásek J, Mravec J, Bouchard R, Blakeslee JJ, Abas M, Seifertová D, Wisniewska J, Tadele Z, Kubes M, Covanová M, Dhonukshe P, Skupa P, Benková E, Perry L, Krecek P, Lee OR, Fink GR, Geisler M, Murphy AS, Luschnig C, Zazimalová E, Friml J (2006) PIN proteins perform a rate-limiting function in cellular auxin efflux. Science 312: 914–918**

Google Scholar: [Author Only](#) [Title Only](#) [Author and Title](#)

**Piñeros MA, Cançado GMA, Kochian LV (2008) Novel properties of the wheat aluminum tolerance organic acid transporter (TaALMT1) revealed by electrophysiological characterization in Xenopus oocytes: functional and structural implications. Plant Physiol 147: 2131–2146**

Google Scholar: [Author Only](#) [Title Only](#) [Author and Title](#)

**Prusinkiewicz P, Crawford S, Smith RS, Ljung K, Bennett T, Ongaro V, Leyser O (2009) Control of bud activation by an auxin transport switch. Proc Natl Acad Sci USA 106: 17431–6**

Google Scholar: [Author Only](#) [Title Only](#) [Author and Title](#)

**Ramesh SA, Tyerman SD, Xu B, Bose J, Kaur S, Conn V, Domingos P, Ullah S, Wege S, Shabala S, Feijó JA, Ryan PR, Gilliam M (2015) GABA signalling modulates plant growth by directly regulating the activity of plant-specific anion transporters. Nature Comm 6: 7879**

Google Scholar: [Author Only](#) [Title Only](#) [Author and Title](#)

**Raven JA (1975) Transport of indoleacetic acid in plant cells in relation to pH and electrical potential gradients, and its significance for polar IAA transport. New Phytol 74:163–172**

Google Scholar: [Author Only](#) [Title Only](#) [Author and Title](#)

**Roepe PD (2000) What is the precise role of human MDR 1 protein in chemotherapeutic drug resistance. Curr Pharm Des 6: 241–260**

Google Scholar: [Author Only](#) [Title Only](#) [Author and Title](#)

**Roman G, Lubarsky B, Kieber JJ, Rothenberg M, Ecker JR (1995) Genetic analysis of ethylene signal transduction in Arabidopsis thaliana: Five novel mutant loci integrated into a stress response pathway. Genetics 139: 1393–1409**

Google Scholar: [Author Only](#) [Title Only](#) [Author and Title](#)

**Rubery PH, Shelldrake AR (1974) Carrier-mediated auxin transport. Planta 118: 101–121**

Google Scholar: [Author Only](#) [Title Only](#) [Author and Title](#)

**Sauer M, Balla J, Luschnig C, Wisniewska J, Reinöhl V, Friml J, Benková E (2006) Canalization of auxin flow by Aux/IAA-ARF-dependent feedback regulation of PIN polarity. Genes & Dev 20: 2902–2911**

Google Scholar: [Author Only](#) [Title Only](#) [Author and Title](#)

**Shinohara N, Taylor C, Leyser O (2013) Strigolactone can promote or inhibit shoot branching by triggering rapid depletion of the auxin efflux protein PIN1 from the plasma membrane. PLoS Biol 11: e1001474**

Google Scholar: [Author Only](#) [Title Only](#) [Author and Title](#)

**Sidler M, Hassa P, Hasan S, Ringli C, Dudler R (1998) Involvement of an ABC transporter in a developmental pathway regulating hypocotyl cell elongation in the light. Plant Cell 10: 1623–1636**

Google Scholar: [Author Only](#) [Title Only](#) [Author and Title](#)

**Smith RS, Bayer EM (2009) Auxin transport-feedback models of patterning in plants. Plant Cell Environ 32: 1258–71**

Google Scholar: [Author Only](#) [Title Only](#) [Author and Title](#)



**Spalding EP (2013) Diverting the downhill flow of auxin to steer growth during tropisms. *Am J Bot* 100: 203-214**

Google Scholar: [Author Only](#) [Title Only](#) [Author and Title](#)

**Stoma S, Lucas M, Chopard J, Schaedel M, Traas J, Godin C (2008) Flux-based transport enhancement as a plausible unifying mechanism for auxin transport in meristem development. *PLoS Comput Biol* 4: e1000207**

Google Scholar: [Author Only](#) [Title Only](#) [Author and Title](#)

**Terasaka K, Blakeslee JJ, Titapiwatanakun B, Peer WA, Bandyopadhyay A, Makam SN, Lee OR, Richards EL, Murphy AS, Sato F, Yazaki K (2005) PGP4, an ATP binding cassette P-glycoprotein, catalyzes auxin transport in *Arabidopsis thaliana* roots. *Plant Cell* 17: 2922–2939**

Google Scholar: [Author Only](#) [Title Only](#) [Author and Title](#)

**Titapiwatanakun B, Blakeslee JJ, Bandyopadhyay A, Yang H, Mravec J, Sauer M, Cheng Y, Adamec J, Nagashima A, Geisler M, Sakai T, Friml J, Peer WA, Murphy AS (2008) ABCB19/PGP19 stabilises PIN1 in membrane microdomains in *Arabidopsis*. *Plant J* 57: 27–44**

Google Scholar: [Author Only](#) [Title Only](#) [Author and Title](#)

**Valverde MA, Diaz M, Sepulveda FV, Gill DR, Hyde SC, Higgins CF (1992) Volume-regulated chloride channels associated with the human multidrug-resistance P-glycoprotein. *Nature* 355: 830-833**

Google Scholar: [Author Only](#) [Title Only](#) [Author and Title](#)

**van Berkel K, de Boer RJ, Scheres B, ten Tusscher K (2013) Polar auxin transport: models and mechanisms. *Development* 140: 2253-68**

Google Scholar: [Author Only](#) [Title Only](#) [Author and Title](#)

**Vincill ED, Clarin AE, Molenda JN, Spalding EP (2013) Interacting glutamate receptor-like proteins in phloem regulate lateral root initiation. *Plant Cell* 25: 1304-1313**

Google Scholar: [Author Only](#) [Title Only](#) [Author and Title](#)

**Vincill, ED, Bieck AM, Spalding EP (2012) Ca<sup>2+</sup> conduction by an amino acid-gated ion channel related to glutamate receptors. *Plant Physiol* 159: 40–46**

Google Scholar: [Author Only](#) [Title Only](#) [Author and Title](#)

**Wang B, Bailly A, Zwiewka M, Henrichs S, Azzarello E, Mancuso S, Maeshima M, Friml J, Schulz A, Geisler M (2013) *Arabidopsis* TWISTED DWARF1 functionally interacts with auxin exporter ABCB1 on the root plasma membrane. *Plant Cell* 25: 202-214**

Google Scholar: [Author Only](#) [Title Only](#) [Author and Title](#)

**Wang W, Li G, Clancy JP, Kirk KL (2005) Activating cystic fibrosis transmembrane conductance regulator channels with pore blocker analogs. *J Biol Chem* 280: 23622-23630**

Google Scholar: [Author Only](#) [Title Only](#) [Author and Title](#)

**Went FW, Thimann KV (1937) *Phytohormones*. MacMillan, New York**

Google Scholar: [Author Only](#) [Title Only](#) [Author and Title](#)

**Weller B, Zourelidou M, Frank L, Barbosa IC, Fastner A, Richter S, Jürgens G, Hammes UZ, Schwechheimer C (2017) Dynamic PIN-FORMED auxin efflux carrier phosphorylation at the plasma membrane controls auxin efflux-dependent growth. *Proc Natl Acad Sci USA* 114(5): E887-E896.**

Google Scholar: [Author Only](#) [Title Only](#) [Author and Title](#)

**Wisniewska J, Xu J, Seifertová D, Brewer PB, Ruzicka K, Bliilou I, Rouquié D, Benková E, Scheres B, Friml J (2006) Polar PIN localization directs auxin flow in plants. *Science* 312: 883**

Google Scholar: [Author Only](#) [Title Only](#) [Author and Title](#)

**Wu G, Lewis DR, Spalding EP (2007) Mutations in *Arabidopsis* multidrug resistance-like ABC transporters separate the roles of acropetal and basipetal auxin transport in lateral root development. *Plant Cell* 19: 1826–1837**

Google Scholar: [Author Only](#) [Title Only](#) [Author and Title](#)

**Wu G, Otegui MS, Spalding EP (2010) The ER-localized TWD1 immunophilin is necessary for localization of multidrug resistance-Like proteins required for polar auxin transport in *Arabidopsis* roots. *Plant Cell* 22: 3295-3304**

Google Scholar: [Author Only](#) [Title Only](#) [Author and Title](#)

**Yang H, Murphy AS (2009) Functional expression and characterization of *Arabidopsis* ABCB, AUX 1 and PIN auxin transporters in *Schizosaccharomyces pombe*. *Plant J* 59: 179-191**

Google Scholar: [Author Only](#) [Title Only](#) [Author and Title](#)

**Zhang Y, Nasser V, Pisanty O, Omary M, Wulff N, Di Donato M, Tal I, Hauser F, Hao P, Roth O, Fromm H, Schroeder JI, Geisler M, Nour-Eldin HH, Shani E (2018) A transportome-scale amiRNA-based screen identifies redundant roles of *Arabidopsis* ABCB6 and ABCB20 in auxin transport. *Nature Communications* volume 9: 4204**

Google Scholar: [Author Only](#) [Title Only](#) [Author and Title](#)

**Zourelidou M, Absmanner B, Weller B, Barbosa IC, Willige BC, Fastner A, Streit V, Port SA, Colcombet J, de la Fuente van Bentem S, Hirt H, Kuster B, Schulze WX, Hammes UZ, Schwechheimer C (2014) Auxin efflux by PIN-FORMED proteins is activated by two different protein kinases, D6 PROTEIN KINASE and PINOID. *Elife* 3: e02860**

Google Scholar: [Author Only](#) [Title Only](#) [Author and Title](#)
